# Supplementary material for: Analysis of Genotype-Environment Interaction and Yield Stability of Introduced Upland Rice in the Groundnut Basin Agroclimatic Zone of Senegal
Source: Hindawi journal article supplement (doi:10.1155/2021/4156167), 2021-10-28
Supplement: f1 [file 4156167.f1.pdf]

| Location   | Genotype | Yield (kg/ha) |
|------------|----------|---------------|
| B16_.E8    | G1       | 4108          |
| B16_.E8    | G2       | 5400          |
| B16_.E8    | G3       | 2383          |
| B16_.E8    | G4       | 2867          |
| B16_.E8    | G5       | 8225          |
| B16_.E8    | G6       | 5217          |
| B16_.E8    | G7       | 6533          |
| B16_.E8    | G8       | 6867          |
| B16_.E8    | G9       | 7900          |
| B16_.E8    | G10      | 3086          |
| DF17_.E1   | G1       | 1441          |
| DF17_.E1   | G2       | 623           |
| DF17_.E1   | G3       | 295           |
| DF17_.E1   | G4       | 53            |
| DF17_.E1   | G5       | 456           |
| DF17_.E1   | G6       | 1348          |
| DF17_.E1   | G7       | 956           |
| DF17_.E1   | G8       | 1204          |
| DF17_.E1   | G9       | 2400          |
| DF17_.E1   | G10      | 3025          |
| KBP17_.E11 | G1       | 7825          |
| KBP17_.E11 | G2       | 9142          |
| KBP17_.E11 | G3       | 4442          |
| KBP17_.E11 | G4       | 4025          |
| KBP17_.E11 | G5       | 6217          |
| KBP17_.E11 | G6       | 6267          |
| KBP17_.E11 | G7       | 6742          |
| KBP17_.E11 | G8       | 6517          |
| KBP17_.E11 | G9       | 7800          |
| KBP17_.E11 | G10      | 5067          |
| MaS17_.E4  | G1       | 3092          |
| MaS17_.E4  | G2       | 2725          |
| MaS17_.E4  | G3       | 3875          |
| MaS17_.E4  | G4       | 1357          |
| MaS17_.E4  | G5       | 2642          |
| MaS17_.E4  | G6       | 3575          |
| MaS17_.E4  | G7       | 3400          |
| MaS17_.E4  | G8       | 4150          |
| MaS17_.E4  | G9       | 4158          |
| MaS17_.E4  | G10      | 2400          |
| MN_.E9     | G1       | 4289          |
| MN_.E9     | G2       | 4024          |
| MN_.E9     | G3       | 3672          |
| MN_.E9     | G4       | 4131          |
| MN_.E9     | G5       | 3453          |
| MN_.E9     | G6       | 2775          |
| MN_.E9     | G7       | 3364          |
| MN_.E9     | G8       | 3583          |
| MN_.E9     | G9       | 3567          |

|           |     |       |
|-----------|-----|-------|
| MN_.E9    | G10 | 3854  |
| MN_.E10   | G1  | 5158  |
| MN_.E10   | G2  | 6458  |
| MN_.E10   | G3  | 7008  |
| MN_.E10   | G4  | 5217  |
| MN_.E10   | G5  | 5408  |
| MN_.E10   | G6  | 5800  |
| MN_.E10   | G7  | 6933  |
| MN_.E10   | G8  | 11150 |
| MN_.E10   | G9  | 6325  |
| MN_.E10   | G10 | 4975  |
| MeS16_.E2 | G1  | 4961  |
| MeS16_.E2 | G2  | 3177  |
| MeS16_.E2 | G3  | 3557  |
| MeS16_.E2 | G4  | 2322  |
| MeS16_.E2 | G5  | 3244  |
| MeS16_.E2 | G6  | 4012  |
| MeS16_.E2 | G7  | 3810  |
| MeS16_.E2 | G8  | 4770  |
| MeS16_.E2 | G9  | 4720  |
| MeS16_.E2 | G10 | 2139  |
| MeS17_.E3 | G1  | 550   |
| MeS17_.E3 | G2  | 2908  |
| MeS17_.E3 | G3  | 2275  |
| MeS17_.E3 | G4  | 2521  |
| MeS17_.E3 | G5  | 724   |
| MeS17_.E3 | G6  | 833   |
| MeS17_.E3 | G7  | 1100  |
| MeS17_.E3 | G8  | 996   |
| MeS17_.E3 | G9  | 1367  |
| MeS17_.E3 | G10 | 625   |
| Nd16_.E7  | G1  | 3974  |
| Nd16_.E7  | G2  | 4088  |
| Nd16_.E7  | G3  | 3945  |
| Nd16_.E7  | G4  | 3436  |
| Nd16_.E7  | G5  | 3328  |
| Nd16_.E7  | G6  | 3259  |
| Nd16_.E7  | G7  | 4767  |
| Nd16_.E7  | G8  | 4847  |
| Nd16_.E7  | G9  | 2282  |
| Nd16_.E7  | G10 | 2784  |
| N16_.E5   | G1  | 4961  |
| N16_.E5   | G2  | 3177  |
| N16_.E5   | G3  | 3557  |
| N16_.E5   | G4  | 2322  |
| N16_.E5   | G5  | 3244  |
| N16_.E5   | G6  | 4012  |
| N16_.E5   | G7  | 3810  |
| N16_.E5   | G8  | 4770  |
| N16_.E5   | G9  | 4720  |

|         |     |      |
|---------|-----|------|
| N16_.E5 | G10 | 2139 |
| N17_.E6 | G1  | 2417 |
| N17_.E6 | G2  | 3400 |
| N17_.E6 | G3  | 1742 |
| N17_.E6 | G4  | 2008 |
| N17_.E6 | G5  | 2450 |
| N17_.E6 | G6  | 2517 |
| N17_.E6 | G7  | 3008 |
| N17_.E6 | G8  | 3550 |
| N17_.E6 | G9  | 3208 |
| N17_.E6 | G10 | 3208 |
